# Supplementary material for: Lithography-Free Route to Hierarchical Structuring of High-χ Block Copolymers on a Gradient Patterned Surface
Source: MDPI journal article supplement (doi:10.3390/ma13020304), 2020-01-09
Supplement: s1 [file s1]

*Supplementary*

# Lithography-Free Route to Hierarchical Structuring of High- $\chi$ Block Copolymers on a Gradient Patterned Surface

Ha Ryeong Cho<sup>1,†</sup>, Ayoung Choe<sup>2,†</sup>, Woon Ik Park<sup>3</sup>, Hyunhyub Ko<sup>2,\*</sup>, Myunghwan Byun<sup>1,4,\*</sup>

<sup>1</sup> Department of Materials Engineering, Keimyung University, Daegu 42601, Republic of Korea 1; haryeungcho@gmail.com

<sup>2</sup> School of Energy and Chemical Engineering, Ulsan National Institute of Science and Technology (UNIST), Ulsan 44919, Republic of Korea 2; ayoung5678@unist.ac.kr, hyunhko@unist.ac.kr

<sup>3</sup> Department of Materials Science and Engineering, Pukyong National University, Pusan 48513, Republic of Korea 3; thane0428@pknu.ac.kr

<sup>4</sup> Department of Advanced Materials Engineering, Keimyung University, Daegu 42601, Republic of Korea 4; myunghbyun@kmu.ac.kr

† These authors contributed equally to this work

\* Correspondence: hyunhko@unist.ac.kr; Tel.: +82-52-217-2532 (H.K.), myunghbyun@kmu.ac.kr; Tel.: +82-53-580-5228 (M.B.)

Received: date; Accepted: date; Published: date

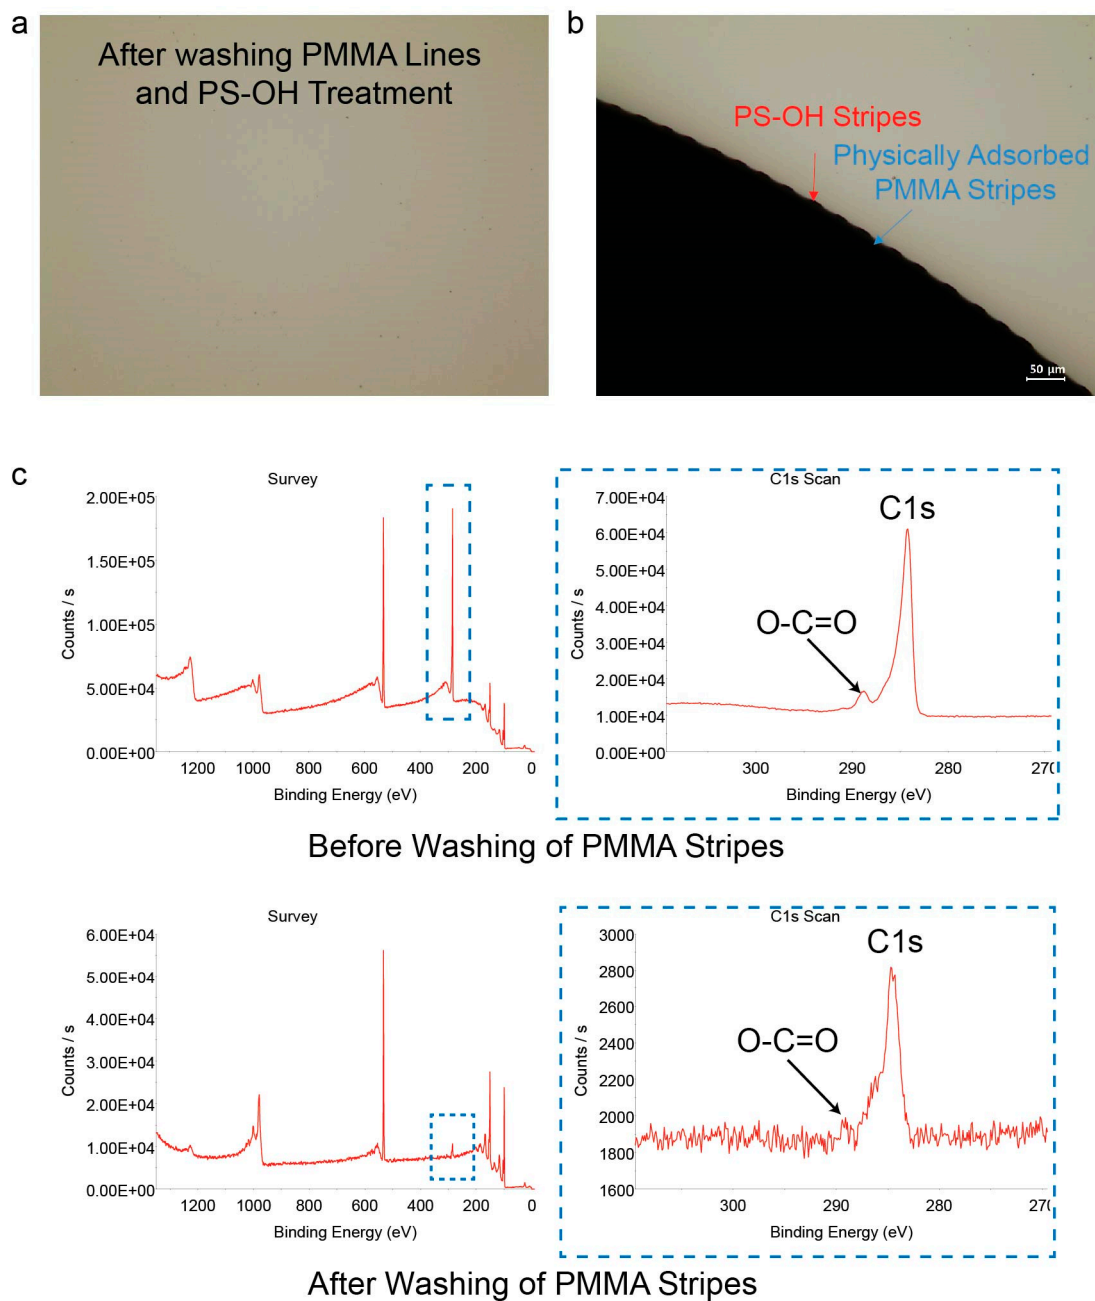

Figure S1. OM observation and XPS investigation of PMMA adsorption on to SiO<sub>x</sub> surface.

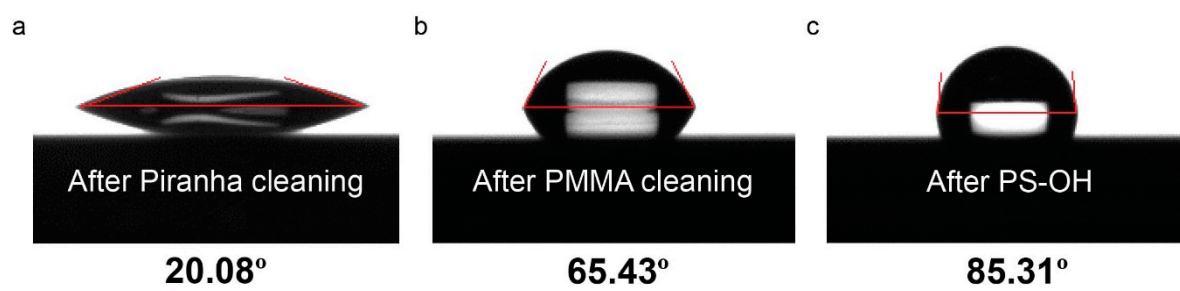

Figure S2: Contact angle measurements of different surfaces.
